# Supplementary material
Source: MDPI journal article supplement (https://www.mdpi.com/2410-3888/8/3/162)
Supplement: s1 [file s1]

## Supplementary Materials

Table S1. Criteria used to exclude loci in heterologous microsatellites by locus and locality.

| Criteria          | Locus | Locality    |             |             |             |             |             |              |              |              |              |             | Average     |
|-------------------|-------|-------------|-------------|-------------|-------------|-------------|-------------|--------------|--------------|--------------|--------------|-------------|-------------|
|                   |       | PAI<br>(34) | PLA<br>(34) | PAR<br>(54) | IQQ<br>(46) | CAL<br>(51) | CQB<br>(56) | THNo<br>(51) | THNc<br>(43) | CBCc<br>(54) | CBCo<br>(49) | NWZ<br>(50) |             |
| Missing data      | Tt29  | 0.03        | 0           | 0           | 0           | 0           | 0           | 0.02         | 0            | 0.02         | 0            | 0.02        | 0.01        |
|                   | Tt48  | 0.26        | 0.09        | 0.02        | 0.30        | 0.04        | 0           | 0.19         | 0.12         | 0.59         | 0.06         | 0.56        | <b>0.20</b> |
|                   | Tt62  | 0           | 0.03        | 0.02        | 0           | 0.08        | 0.02        | 0            | 0            | 0.02         | 0            | 0           | 0.01        |
|                   | Tt133 | 0           | 0.06        | 0.02        | 0           | 0.04        | 0.02        | 0.02         | 0            | 0.02         | 0            | 0.02        | 0.02        |
|                   | TmurA |             |             |             |             |             |             |              |              |              |              |             |             |
|                   | 101   | 0           | 0.03        | 0           | 0           | 0           | 0           | 0            | 0            | 0.02         | 0            | 0           | 0           |
|                   | TmurA |             |             |             |             |             |             |              |              |              |              |             |             |
|                   | 104   | 0.09        | 0.09        | 0.02        | 0           | 0.02        | 0           | 0.09         | 0.02         | 0            | 0            | 0           | 0.03        |
|                   | TmurA |             |             |             |             |             |             |              |              |              |              |             |             |
|                   | 115   | 0.09        | 0.21        | 0.04        | 0           | 0.06        | 0           | 0.12         | 0.06         | 0.04         | 0.04         | 0.04        | 0.06        |
| Homozygote excess | Tt29  | -0.11       | -0.13       | -0.03       | 0.01        | -0.01       | 0.06        | 0.10         | 0.09         | 0.06         | 0.01         | 0.12        | 0.02        |
|                   | Tt48  | 0.12        | -0.03       | 0.04        | 0.32        | 0.01        | 0.09        | 0.42         | 0.02         | 0.45         | 0.01         | 0.54        | <b>0.18</b> |
|                   | Tt62  | 0.02        | -0.09       | -0.04       | 0.05        | -0.08       | -0.07       | 0.05         | -0.13        | 0.04         | -0.03        | 0.10        | -0.02       |
|                   | Tt133 | 0           | 0.13        | 0.19        | 0.04        | 0.22        | 0.05        | 0.03         | 0.06         | -0.08        | 0.33         | 0.29        | 0.11        |
|                   | TmurA |             |             |             |             |             |             |              |              |              |              |             |             |
|                   | 101   | 0.08        | 0.15        | 0.08        | 0.19        | 0.13        | 0.03        | 0.13         | 0.15         | -0.02        | 0.11         | 0.07        | 0.10        |
|                   | TmurA |             |             |             |             |             |             |              |              |              |              |             |             |
|                   | 104   | 0.09        | 0.09        | 0.07        | 0.04        | -0.03       | 0.01        | 0.14         | 0.07         | 0.01         | 0.04         | -0.01       | 0.05        |
|                   | TmurA |             |             |             |             |             |             |              |              |              |              |             |             |
|                   | 115   | 0.23        | 0.15        | 0.04        | 0.06        | 0.05        | 0.02        | 0.11         | 0.08         | 0            | 0.05         | 0.10        | 0.08        |
| Null alleles      | Tt29  | 0           | 0           | 0           | 0           | 0           | 0.02        | 0.02         | 0.04         | 0.02         | 0            | 0.05        | 0.01        |
|                   | Tt48  | 0.04        | 0           | 0.01        | 0.14        | 0           | 0.03        | 0.05         | 0.18         | 0.19         | 0            | 0.21        | 0.08        |
|                   | Tt62  | 0           | 0           | 0           | 0.02        | 0           | 0           | 0            | 0.02         | 0.02         | 0            | 0.04        | 0.01        |
|                   | Tt133 | 0           | 0.05        | 0.08        | 0           | 0.09        | 0.02        | 0.02         | 0.01         | 0            | 0.14         | 0.13        | 0.05        |
|                   | TmurA |             |             |             |             |             |             |              |              |              |              |             |             |
|                   | 101   | 0.03        | 0.06        | 0.04        | 0.09        | 0.06        | 0.01        | 0.06         | 0.06         | 0            | 0.05         | 0.02        | 0.04        |
|                   | TmurA |             |             |             |             |             |             |              |              |              |              |             |             |
|                   | 104   | 0.04        | 0.03        | 0.03        | 0.01        | 0           | 0           | 0.03         | 0.06         | 0            | 0.01         | 0           | 0.02        |
|                   | TmurA |             |             |             |             |             |             |              |              |              |              |             |             |
|                   | 115   | 0.10        | 0.06        | 0           | 0.03        | 0.02        | 0           | 0.03         | 0.05         | 0            | 0.02         | 0.04        | 0.03        |

PAI: Paita. PLA: Punta Lobos Afuera; PAR: Paracas; IQQ: Iquique; CAL: Caldera; CQB: Coquimbo; THNc: costal Talcahuano; THNo: oceanic Talcahuano; CBCc: costal Calbuco; CBCo: oceanic Calbuco; NWZ: New Zealand. Number inside parentheses correspond to sample size by location.

Table S2. Summary statistics of genetic diversity for *Trachurus murphyi* in South Pacific Ocean

| Locus    | Parameter | Locality |        |              |        |              |              |              |              |        |              |              |
|----------|-----------|----------|--------|--------------|--------|--------------|--------------|--------------|--------------|--------|--------------|--------------|
|          |           | PAI      | PLA    | PAR          | IQQ    | CAL          | CQB          | THNc         | THNo         | CBCc   | CBCo         | NWZ          |
| Tt29     | N         | 33       | 34     | 54           | 46     | 51           | 56           | 42           | 51           | 53     | 49           | 49           |
|          | NA        | 9        | 10     | 12           | 10     | 10           | 12           | 13           | 12           | 14     | 11           | 12           |
|          | HO        | 0.788    | 0.882  | 0.741        | 0.761  | 0.765        | 0.714        | 0.714        | 0.667        | 0.736  | 0.673        | 0.653        |
|          | HE        | 0.7      | 0.773  | 0.715        | 0.758  | 0.75         | 0.756        | 0.777        | 0.733        | 0.775  | 0.676        | 0.733        |
|          | F         | -0.125   | -0.141 | -0.036       | -0.004 | -0.02        | 0.055        | 0.081        | 0.09         | 0.051  | 0.004        | 0.11         |
|          | HW        | 0.651    | 0.881  | 0.885        | 0.709  | 0.952        | 0.982        | <b>0.000</b> | 0.349        | 0.954  | 0.002        | 0.322        |
| Tt62     | N         | 34       | 33     | 53           | 46     | 47           | 55           | 43           | 51           | 53     | 49           | 50           |
|          | NA        | 15       | 12     | 13           | 14     | 16           | 14           | 15           | 10           | 16     | 12           | 15           |
|          | HO        | 0.882    | 0.909  | 0.887        | 0.826  | 0.936        | 0.909        | 0.977        | 0.824        | 0.83   | 0.878        | 0.78         |
|          | HE        | 0.883    | 0.826  | 0.848        | 0.859  | 0.862        | 0.842        | 0.856        | 0.857        | 0.861  | 0.844        | 0.855        |
|          | F         | 0.001    | -0.101 | -0.046       | 0.038  | -0.086       | -0.079       | -0.141       | 0.039        | 0.035  | -0.039       | 0.087        |
|          | HW        | 0.954    | 0.976  | 0.411        | 0.025  | 1.000        | <b>0.000</b> | 0.195        | 0.071        | 0.037  | <b>0.000</b> | 0.251        |
| Tt133    | N         | 34       | 32     | 53           | 46     | 49           | 55           | 42           | 51           | 53     | 49           | 49           |
|          | NA        | 28       | 20     | 26           | 35     | 31           | 31           | 26           | 27           | 30     | 23           | 22           |
|          | HO        | 0.912    | 0.75   | 0.698        | 0.87   | 0.673        | 0.855        | 0.833        | 0.824        | 0.943  | 0.551        | 0.571        |
|          | HE        | 0.901    | 0.843  | 0.854        | 0.898  | 0.848        | 0.893        | 0.872        | 0.84         | 0.864  | 0.806        | 0.798        |
|          | F         | -0.012   | 0.111  | 0.183        | 0.032  | 0.206        | 0.043        | 0.044        | 0.019        | -0.091 | 0.316        | 0.284        |
|          | HW        | 0.959    | 0.018  | <b>0.000</b> | 0.686  | <b>0.000</b> | <b>0.000</b> | 1.000        | <b>0.000</b> | 0.434  | <b>0.000</b> | <b>0.000</b> |
| TmurA101 | N         | 34       | 33     | 54           | 46     | 51           | 56           | 43           | 51           | 53     | 49           | 50           |
|          | NA        | 19       | 27     | 31           | 26     | 25           | 25           | 26           | 25           | 28     | 28           | 30           |
|          | HO        | 0.853    | 0.818  | 0.87         | 0.761  | 0.824        | 0.893        | 0.791        | 0.824        | 0.943  | 0.837        | 0.88         |
|          | HE        | 0.914    | 0.943  | 0.941        | 0.927  | 0.935        | 0.912        | 0.913        | 0.932        | 0.918  | 0.928        | 0.932        |
|          | F         | 0.067    | 0.132  | 0.075        | 0.179  | 0.119        | 0.021        | 0.134        | 0.117        | -0.027 | 0.098        | 0.056        |
|          | HW        | 0.266    | 0.019  | 0.083        | 0.017  | 0.67         | 0.004        | 0.734        | 0.005        | 0.978  | 0.996        | 0.001        |
| TmurA104 | N         | 31       | 31     | 53           | 46     | 50           | 56           | 39           | 50           | 54     | 49           | 50           |
|          | NA        | 22       | 23     | 26           | 25     | 24           | 26           | 26           | 27           | 26     | 26           | 26           |
|          | HO        | 0.871    | 0.871  | 0.887        | 0.913  | 0.98         | 0.946        | 0.897        | 0.82         | 0.944  | 0.918        | 0.96         |
|          | HE        | 0.94     | 0.938  | 0.945        | 0.942  | 0.939        | 0.949        | 0.949        | 0.945        | 0.941  | 0.945        | 0.937        |
|          | F         | 0.074    | 0.071  | 0.061        | 0.031  | -0.043       | 0.003        | 0.054        | 0.132        | -0.004 | 0.029        | -0.025       |
|          | HW        | 0.044    | 0.853  | 0.106        | 0.765  | 0.946        | 0.254        | 0.842        | 0.038        | 0.24   | 0.094        | 0.887        |
| TmurA115 | N         | 31       | 27     | 52           | 46     | 48           | 56           | 38           | 48           | 52     | 47           | 48           |
|          | NA        | 27       | 24     | 32           | 29     | 30           | 31           | 31           | 30           | 31     | 32           | 33           |
|          | HO        | 0.742    | 0.815  | 0.923        | 0.891  | 0.917        | 0.946        | 0.895        | 0.854        | 0.962  | 0.915        | 0.875        |
|          | HE        | 0.946    | 0.939  | 0.955        | 0.942  | 0.951        | 0.954        | 0.954        | 0.95         | 0.951  | 0.953        | 0.959        |
|          | F         | 0.216    | 0.132  | 0.034        | 0.053  | 0.036        | 0.008        | 0.062        | 0.101        | -0.011 | 0.04         | 0.087        |
|          | HW        | 0.003    | 0.041  | 0.395        | 0.048  | 0.614        | 0.014        | 0.048        | 0.212        | 0.148  | 0.797        | 0.001        |

PAI: Paita. PLA: Punta Lobos Afuera; PAR: Paracas; IQQ: Iquique; CAL: Caldera; CQB: Coquimbo; THNc: costal Talcahuano; THNo: oceanic Talcahuano; CBCc: costal Calbuco; CBCo: oceanic Calbuco; NWZ: New Zealand.
